# Supplementary material
Source: publisher site journal article supplement (https://www.dovepress.com/article/413515)
Supplement: Supplementary file 1 [file get_supplementary_file.php]

**Table S1.** Pharmacokinetic parameters of liraglutide after the oral administration of pure liraglutide (Lira) or EAC-Lira to rats (mean  $\pm$  SD, n = 4).

| <b>Parameters</b>        | <b>Lira</b> | <b>EAC-Lira</b> |
|--------------------------|-------------|-----------------|
| T <sub>max</sub> (h)     | n.d.        | 2.0 $\pm$ 0.0   |
| C <sub>max</sub> (ng/mL) | n.d.        | 71.1 $\pm$ 36.3 |
| AUC (ng•h/mL)            | n.d.        | 480 $\pm$ 253   |

n.d.: not determined (below the limit of quantitation (5 ng/mL)).

The dose was equivalent to 15 mg/kg of liraglutide.

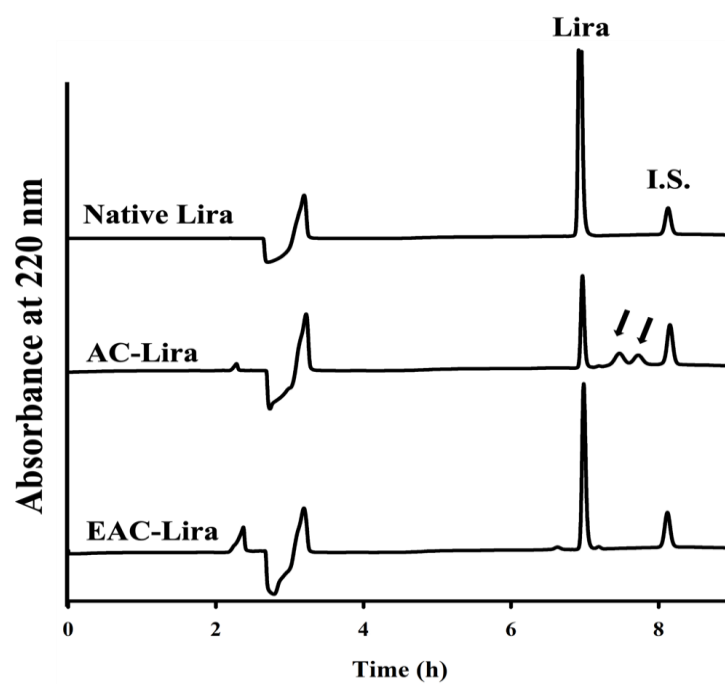

**Fig. S1.** HPLC chromatograms of liraglutide released from nanoparticles after 2 h- incubation in simulated gastric fluids (pH 1.2). I.S.: internal standard. The black arrows indicate the impurities.

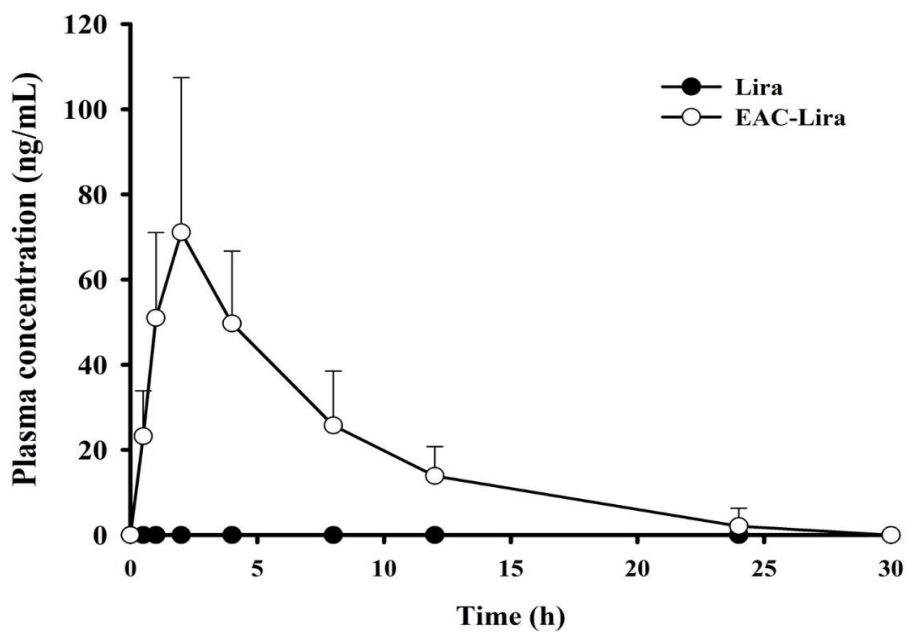

**Fig. S2.** Plasma concentration-time profiles of liraglutide after the oral administration of pure liraglutide (Lira) or EAC-Lira to rats (mean  $\pm$  SD, n = 4). The dose was equivalent to 15 mg/kg of liraglutide.
